# Supplementary material
Source: PubMed Central journal article supplement (PMC5778356)
Supplement: IAI.00792-17_zii999092287s1.pdf [file IAI.00792-17_zii999092287s1.pdf]

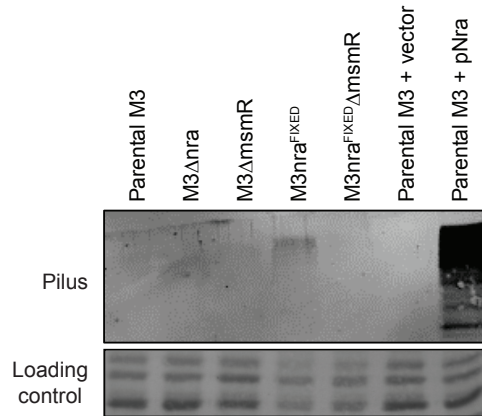

**Figure S1**

**Reverting the non-synonymous SNP present within the M3 *nra* allele results in a small, but reproducible, increase in pilus expression.** Western blot analysis. The parental M3 isolate (MGAS10870) and derivatives M3Δnra, M3ΔmsmR, M3nra<sup>FIXED</sup>, and M3nra<sup>FIXED</sup>ΔmsmR were evaluated for pilus expression. Cell wall proteins were isolated from exponential phase cultures and assayed for reactivity to an anti-pilus (T3) antibody. Data is representative of three separate experiments.

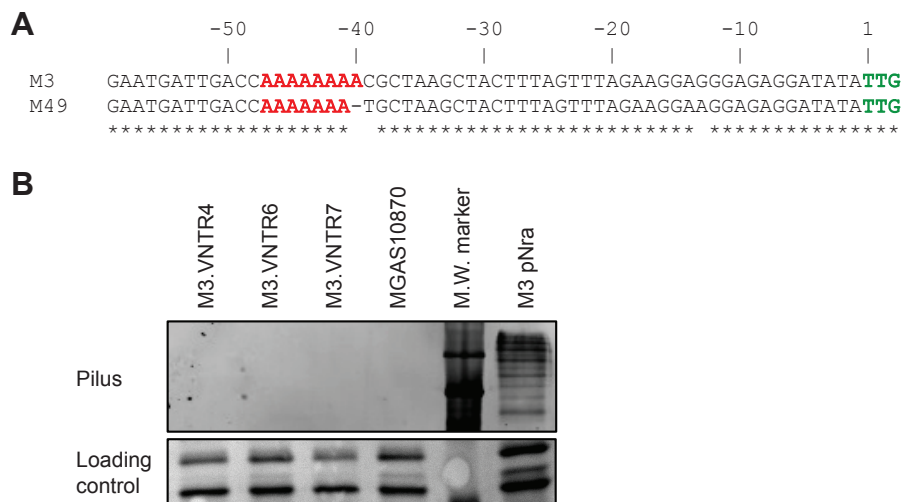

**Figure S2**

**A VNTR located within the *nra.cpa* intergenic region does not influence M3 GAS pilus expression.**

(A) Schematic of the polynucleotide VNTR (red nucleotides) upstream of *cpa* in M3 and M49 GAS. The *cpa* translational start codon (TTG) is shown in green. (B) Western blot analysis of pilus expression in parental M3 isolate MGAS10870 and altered (8A to 7A) VNTR mutant derivatives (note that M3.VNTR4, M3.VNTR6, and M3.VNTR7 are independently created derivatives).

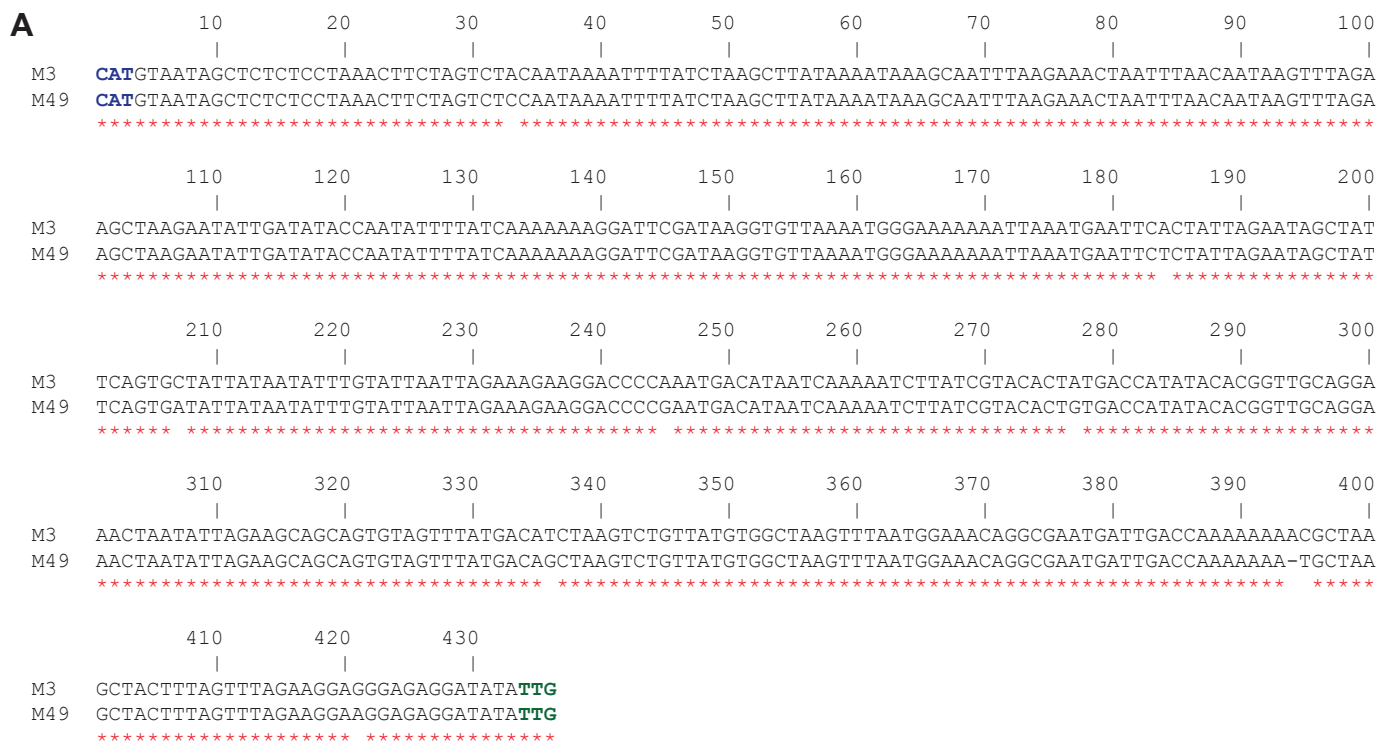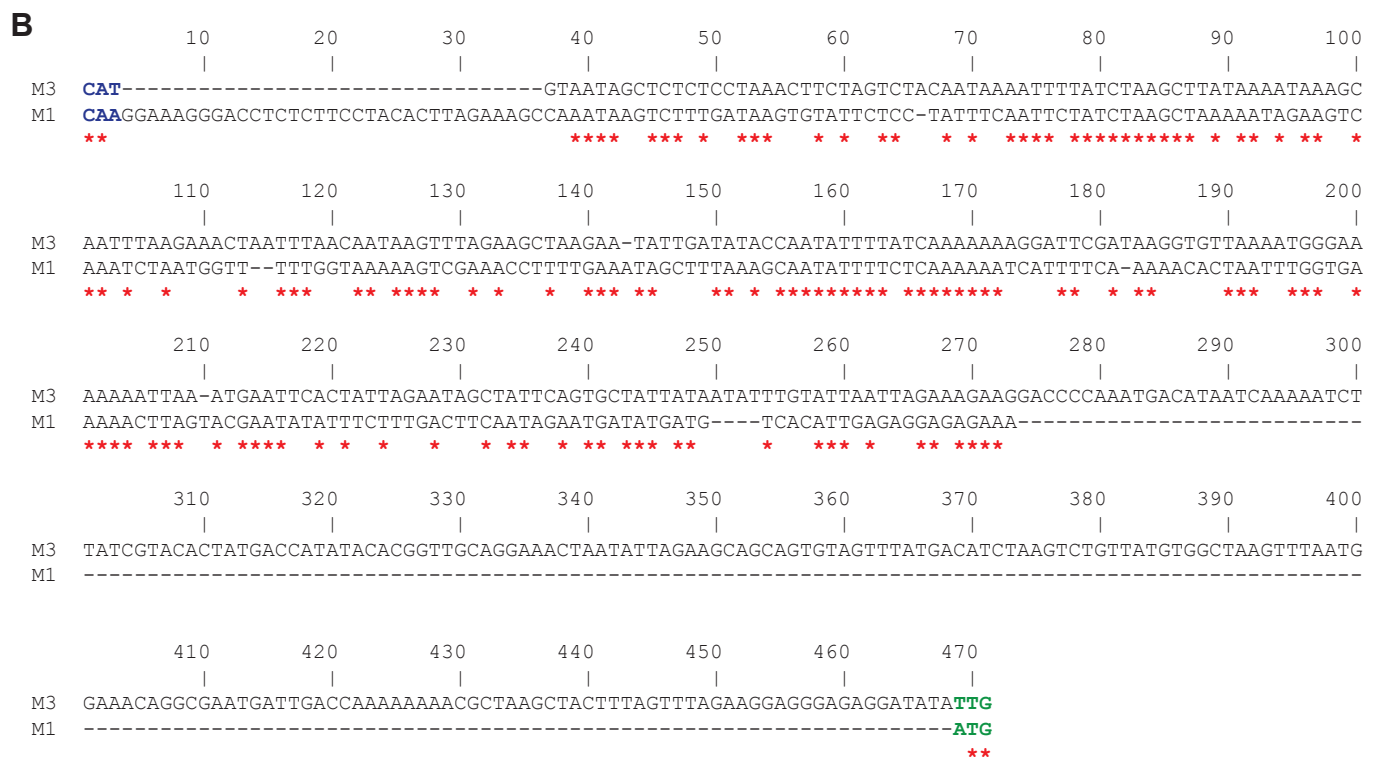

**Figure S3**  
**Comparison of the *nra-cpa* intergenic region in M3 GAS with the equivalent regions in M1 and M49 GAS.**  
 Conserved nucleotides are highlighted by red asterisks. The *nra/rofA* start codons are shown in blue, while the *cpa* start codon is shown in green. (A) Comparison between M3 and M49 GAS. (B) Comparison between M3 and M1 GAS.

| Gene name in M1       | Gene name in M3   | Function of encoded protein                               | Fold change in transcript level for MGAS10870 (M3) relative to MGAS2221 (M1) |
|-----------------------|-------------------|-----------------------------------------------------------|------------------------------------------------------------------------------|
| <i>M5005_Spy_0144</i> | <i>SpyM3_0132</i> | hypothetical protein                                      | 637.00                                                                       |
| <i>hasB</i>           | <i>hasB</i>       | UDP-glucose 6-dehydrogenase                               | 230.00                                                                       |
| <i>hasA</i>           | <i>hasA</i>       | hyaluronan synthase                                       | 188.33                                                                       |
| <i>hasC</i>           | <i>hasC</i>       | UDP-glucose pyrophosphorylase                             | 137.00                                                                       |
| <i>M5005_Spy_0143</i> | <i>SpyM3_0131</i> | hypothetical protein                                      | 106.00                                                                       |
| <i>mac</i>            | <i>SpyM3_0583</i> | hypothetical protein                                      | 89.60                                                                        |
| <i>scpC</i>           | <i>scpC</i>       | cell envelope proteinase                                  | 66.40                                                                        |
| <i>M5005_Spy_0352</i> | <i>SpyM3_0305</i> | hypothetical protein                                      | 48.33                                                                        |
| <i>M5005_Spy_0354</i> | <i>SpyM3_0307</i> | hypothetical protein                                      | 20.86                                                                        |
| <i>spn</i>            | <i>spn</i>        | NAD glycohydrolase                                        | 15.17                                                                        |
| <i>slo</i>            | <i>slo</i>        | streptolysin O                                            | 14.17                                                                        |
| <i>M5005_Spy_0353</i> | <i>SpyM3_0306</i> | hypothetical protein                                      | 14.13                                                                        |
| <i>ifs</i>            | <i>ifs</i>        | hypothetical protein                                      | 13.84                                                                        |
| <i>sse</i>            | <i>sse</i>        | esterase                                                  | 13.50                                                                        |
| <i>spyA</i>           | <i>SpyM3_0304</i> | hypothetical protein                                      | 12.08                                                                        |
| <i>M5005_Spy_1417</i> | <i>SpyM3_1209</i> | hypothetical protein                                      | 11.00                                                                        |
| <i>M5005_Spy_1731</i> | <i>SpyM3_1739</i> | hypothetical protein                                      | 11.00                                                                        |
| <i>M5005_Spy_0115</i> | <i>SpyM3_0105</i> | hypothetical protein                                      | 9.00                                                                         |
| <i>M5005_Spy_1820</i> | <i>SpyM3_1821</i> | hypothetical protein                                      | 8.88                                                                         |
| <i>M5005_Spy_1431</i> | <i>SpyM3_1426</i> | hypothetical protein                                      | 8.50                                                                         |
| <i>M5005_Spy_1274</i> | <i>SpyM3_1195</i> | hypothetical protein                                      | 8.40                                                                         |
| <i>M5005_Spy_1784</i> | <i>SpyM3_1786</i> | PTS system transporter protein II                         | 8.20                                                                         |
| <i>M5005_Spy_1787</i> | <i>SpyM3_1789</i> | hypothetical protein                                      | 8.00                                                                         |
| <i>arcA</i>           | <i>arcA</i>       | arginine deiminase                                        | 7.75                                                                         |
| <i>M5005_Spy_1821</i> | <i>SpyM3_1822</i> | hypothetical protein                                      | 7.60                                                                         |
| <i>cadC</i>           | <i>cadX</i>       | cadmium efflux system accessory protein                   | 7.57                                                                         |
| <i>arcB</i>           | <i>arcB</i>       | ornithine carbamoyltransferase                            | 7.50                                                                         |
| <i>M5005_Spy_1418</i> | <i>SpyM3_1210</i> | hypothetical protein                                      | 7.50                                                                         |
| <i>dexS</i>           | <i>dexS</i>       | dextran glucosidase                                       | 7.50                                                                         |
| <i>M5005_Spy_1425</i> | <i>SpyM3_1420</i> | hypothetical protein                                      | 7.33                                                                         |
| <i>M5005_Spy_0777</i> | <i>sclB</i>       | hypothetical protein                                      | 7.23                                                                         |
| <i>cadD</i>           | <i>cadD</i>       | cadmium resistance protein                                | 7.14                                                                         |
| <i>M5005_Spy_1435</i> | <i>SpyM3_1430</i> | hypothetical protein                                      | 7.13                                                                         |
| <i>M5005_Spy_1426</i> | <i>SpyM3_1421</i> | tail protein - phage associated                           | 7.00                                                                         |
| <i>M5005_Spy_1434</i> | <i>SpyM3_1429</i> | hypothetical protein                                      | 7.00                                                                         |
| <i>M5005_Spy_1271</i> | <i>SpyM3_1192</i> | hypothetical protein                                      | 6.50                                                                         |
| <i>M5005_Spy_1272</i> | <i>SpyM3_1193</i> | arginine repressor                                        | 6.50                                                                         |
| <i>M5005_Spy_1428</i> | <i>SpyM3_1423</i> | hypothetical protein                                      | 6.50                                                                         |
| <i>M5005_Spy_1819</i> | <i>SpyM3_1820</i> | hypothetical protein                                      | 6.08                                                                         |
| <i>M5005_Spy_0854</i> | <i>SpyM3_0790</i> | Na <sup>+</sup> driven multidrug efflux pump              | 6.00                                                                         |
| <i>M5005_Spy_1049</i> | <i>SpyM3_0976</i> | hypothetical protein                                      | 5.83                                                                         |
| <i>M5005_Spy_1429</i> | <i>SpyM3_1424</i> | hypothetical protein                                      | 5.83                                                                         |
| <i>M5005_Spy_1427</i> | <i>SpyM3_1422</i> | hypothetical protein                                      | 5.80                                                                         |
| <i>M5005_Spy_1430</i> | <i>SpyM3_1425</i> | hypothetical protein                                      | 5.75                                                                         |
| <i>M5005_Spy_1432</i> | <i>SpyM3_1427</i> | hypothetical protein                                      | 5.62                                                                         |
| <i>arcC</i>           | <i>arcC</i>       | carbamate kinase                                          | 5.00                                                                         |
| <i>ska</i>            | <i>ska</i>        | streptokinase A precursor                                 | 4.63                                                                         |
| <i>M5005_Spy_1433</i> | <i>SpyM3_1428</i> | hypothetical protein                                      | 4.60                                                                         |
| <i>M5005_Spy_1556</i> | <i>SpyM3_1583</i> | hypothetical protein                                      | 4.35                                                                         |
| <i>M5005_Spy_0652</i> | <i>SpyM3_0570</i> | hypothetical protein                                      | 4.31                                                                         |
| <i>M5005_Spy_1824</i> | <i>SpyM3_1826</i> | hypothetical protein                                      | 4.17                                                                         |
| <i>M5005_Spy_0716</i> | <i>SpyM3_0629</i> | hypothetical protein                                      | 4.14                                                                         |
| <i>M5005_Spy_0717</i> | <i>SpyM3_0630</i> | hypothetical protein                                      | 3.91                                                                         |
| <i>M5005_Spy_0706</i> | <i>SpyM3_0619</i> | ABC transporter (binding protein)                         | 3.82                                                                         |
| <i>scpA</i>           | <i>scpA</i>       | C5A peptidase precursor                                   | 3.82                                                                         |
| <i>M5005_Spy_1678</i> | <i>SpyM3_1693</i> | transport accessory protein                               | 3.77                                                                         |
| <i>M5005_Spy_0080</i> | <i>SpyM3_0072</i> | histidine triad (HIT) protein                             | 3.76                                                                         |
| <i>M5005_Spy_1528</i> | <i>fhuD.2</i>     | ferrichrome ABC transporter (ferrichrome-binding protein) | 3.75                                                                         |
| <i>M5005_Spy_0281</i> | <i>SpyM3_0243</i> | hypothetical protein                                      | 3.72                                                                         |
| <i>M5005_Spy_1441</i> | <i>SpyM3_1436</i> | terminase small subunit - phage associated                | 3.67                                                                         |
| <i>M5005_Spy_1437</i> | <i>SpyM3_1432</i> | hypothetical protein                                      | 3.63                                                                         |

|                           |                   |                                                                            |       |
|---------------------------|-------------------|----------------------------------------------------------------------------|-------|
| <i>spy0843 from SF370</i> | <i>SpyM3_0569</i> | surface antigen                                                            | 3.62  |
| <i>M5005_Spy_0707</i>     | <i>SpyM3_0620</i> | ABC transporter (permease)                                                 | 3.55  |
| <i>M5005_Spy_0543</i>     | <i>adcA</i>       | adhesion protein                                                           | 3.50  |
| <i>M5005_Spy_1279</i>     | <i>SpyM3_1200</i> | hypothetical protein                                                       | 3.48  |
| <i>M5005_Spy_0403</i>     | <i>SpyM3_0344</i> | hypothetical protein                                                       | 3.33  |
| <i>M5005_Spy_1843</i>     | <i>SpyM3_1843</i> | hypothetical protein                                                       | 3.31  |
| <i>mutY</i>               | <i>mutY</i>       | A/G-specific adenine glycosylase                                           | 3.19  |
| <i>M5005_Spy_1525</i>     | <i>cycD</i>       | ABC transporter ATP-binding protein                                        | 3.17  |
| <i>M5005_Spy_1156</i>     | <i>SpyM3_1082</i> | hypothetical protein                                                       | 3.14  |
| <i>M5005_Spy_1822</i>     | <i>SpyM3_1823</i> | hypothetical protein                                                       | 3.00  |
| <i>M5005_Spy_1530</i>     | <i>SpyM3_1561</i> | hypothetical protein                                                       | 3.00  |
| <i>M5005_Spy_1785</i>     | <i>SpyM3_1787</i> | transcriptional repressor                                                  | 3.00  |
| <i>braB</i>               | <i>braB</i>       | branched-chain amino acid transport protein                                | 3.00  |
| <i>rpmG</i>               | <i>rpmG</i>       | 50S ribosomal protein L33                                                  | 2.94  |
| <i>scrB</i>               | <i>scrB</i>       | sucrose-6-phosphate hydrolase                                              | 2.86  |
| <i>fhuC</i>               | <i>fhuC.2</i>     | ferrichrome transport ATP-binding protein                                  | 2.75  |
| <i>M5005_Spy_0270</i>     | <i>atmA</i>       | ABC transporter substrate-binding protein                                  | 2.64  |
| <i>M5005_Spy_1313</i>     | <i>SpyM3_1293</i> | beta-glucosidase                                                           | 2.60  |
| <i>M5005_Spy_0647</i>     | <i>SpyM3_0566</i> | glycerophosphodiester phosphodiesterase                                    | 2.58  |
| <i>sodA</i>               | <i>sodM</i>       | superoxide dismutase                                                       | 2.54  |
| <i>M5005_Spy_1454</i>     | <i>SpyM3_1446</i> | hypothetical protein                                                       | 2.50  |
| <i>M5005_Spy_1691</i>     | <i>rgfB</i>       | RgfB protein                                                               | 2.50  |
| <i>M5005_Spy_0085</i>     | <i>SpyM3_0077</i> | DNA binding protein                                                        | 2.50  |
| <i>mnmA</i>               | <i>mnmA</i>       | tRNA-specific 2-thiouridylase MnmA                                         | 2.46  |
| <i>pcp</i>                | <i>pcp</i>        | pyrrolidone-carboxylate peptidase                                          | 2.44  |
| <i>M5005_Spy_0646</i>     | <i>SpyM3_0565</i> | ABC transporter permease                                                   | 2.43  |
| <i>M5005_Spy_1391</i>     | <i>SpyM3_1478</i> | hypothetical protein                                                       | 2.41  |
| <i>M5005_Spy_0976</i>     | <i>SpyM3_0900</i> | hypothetical protein                                                       | 2.37  |
| <i>M5005_Spy_1386</i>     | <i>SpyM3_1473</i> | hypothetical protein                                                       | 2.34  |
| <i>M5005_Spy_0402</i>     | <i>SpyM3_0343</i> | hypothetical protein                                                       | 2.33  |
| <i>M5005_Spy_1667</i>     | <i>SpyM3_1682</i> | hypothetical protein                                                       | 2.33  |
| <i>coaA</i>               | <i>coaA</i>       | pantothenate kinase                                                        | 2.33  |
| <i>M5005_Spy_0186</i>     | <i>SpyM3_0157</i> | regulatory protein RofA related                                            | 2.33  |
| <i>folD</i>               | <i>folD</i>       | bifunctional 5,10-methylene-tetrahydrofolate dehydrogenase/ 5,10-methylene | 2.31  |
| <i>M5005_Spy_0338</i>     | <i>SpyM3_0295</i> | arsenate reductase                                                         | 2.29  |
| <i>M5005_Spy_0275</i>     | <i>SpyM3_0237</i> | serine/threonine transporter SstT                                          | 2.28  |
| <i>M5005_Spy_1558</i>     | <i>SpyM3_1585</i> | hypothetical protein                                                       | 2.25  |
| <i>M5005_Spy_0645</i>     | <i>SpyM3_0564</i> | ABC transporter ATP-binding protein                                        | 2.22  |
| <i>M5005_Spy_0856</i>     | <i>SpyM3_0792</i> | ABC transporter (binding protein)                                          | 2.21  |
| <i>M5005_Spy_1453</i>     | <i>SpyM3_1445</i> | hypothetical protein                                                       | 2.20  |
| <i>adk</i>                | <i>adk</i>        | adenylate kinase                                                           | 2.19  |
| <i>M5005_Spy_1280</i>     | <i>yesM</i>       | two-component sensor histidine kinase                                      | 2.19  |
| <i>M5005_Spy_0534</i>     | <i>SpyM3_0458</i> | acetoin reductase                                                          | 2.19  |
| <i>M5005_Spy_1515</i>     | <i>SpyM3_1547</i> | hypothetical protein                                                       | 2.18  |
| <i>dinP</i>               | <i>dinP</i>       | DNA polymerase IV                                                          | 2.18  |
| <i>M5005_Spy_0500</i>     | <i>SpyM3_0425</i> | N-acetylmuramoyl-L-alanine amidase                                         | 2.18  |
| <i>pepO</i>               | <i>pepO</i>       | endopeptidase O                                                            | 2.17  |
| <i>M5005_Spy_1579</i>     | <i>SpyM3_1605</i> | repressor                                                                  | 2.16  |
| <i>M5005_Spy_0312</i>     | <i>SpyM3_0271</i> | 23S rRNA methyltransferase                                                 | 2.15  |
| <i>M5005_Spy_1465</i>     | <i>SpyM3_1264</i> | hypothetical protein                                                       | 2.09  |
| <i>aroB</i>               | <i>aroB</i>       | 3-dehydroquinate synthase                                                  | 2.09  |
| <i>M5005_Spy_0501</i>     | <i>SpyM3_0426</i> | hypothetical protein                                                       | 2.06  |
| <i>M5005_Spy_1235</i>     | <i>SpyM3_1158</i> | phosphomannomutase                                                         | 2.04  |
| <i>M5005_Spy_0849</i>     | <i>rluD</i>       | ribosomal large subunit pseudouridine synthase                             | 2.03  |
| <i>mtsC</i>               | <i>mtsC</i>       | integral membrane protein MtsC, ABC transporter (permease protein)         | 2.02  |
| <i>M5005_Spy_0493</i>     | <i>SpyM3_0419</i> | hypothetical protein                                                       | 2.02  |
| <i>M5005_Spy_1416</i>     | <i>SpyM3_1412</i> | cell wall hydrolase, lysin - phage associated                              | 2.00  |
| <i>lacE</i>               | <i>lacE</i>       | PTS system lactose-specific transporter subunit IIBC                       | 2.00  |
| <i>M5005_Spy_1086</i>     | <i>SpyM3_1008</i> | hypothetical protein                                                       | 2.00  |
| <i>M5005_Spy_1094</i>     | <i>SpyM3_1020</i> | hypothetical protein                                                       | 2.00  |
| <i>gidA</i>               | <i>gidA</i>       | tRNA uridine 5-carboxymethylaminomethyl modification enzyme GidA           | 2.00  |
| <i>M5005_Spy_1348</i>     | <i>SpyM3_1383</i> | permease                                                                   | -2.00 |
| <i>cfa</i>                | <i>cfa</i>        | cAMP factor                                                                | -2.00 |
| <i>M5005_Spy_0978</i>     | <i>SpyM3_0903</i> | Na(+)-linked D-alanine glycine permease                                    | -2.00 |
| <i>M5005_Spy_1347</i>     | <i>SpyM3_1382</i> | 3-hydroxybutyrate dehydrogenase                                            | -2.00 |
| <i>M5005_Spy_1722</i>     | <i>SpyM3_1730</i> | hypothetical protein                                                       | -2.00 |

|                       |                   |                                                            |       |
|-----------------------|-------------------|------------------------------------------------------------|-------|
| <i>ihk</i>            | <i>ihk</i>        | histidine kinase                                           | -2.00 |
| <i>dnaK</i>           | <i>dnaK</i>       | molecular chaperone DnaK                                   | -2.01 |
| <i>pmi</i>            | <i>pmi</i>        | mannose-6-phosphate isomerase                              | -2.02 |
| <i>M5005_Spy_0944</i> | <i>SpyM3_0870</i> | 16S rRNA m(2)G 1207 methyltransferase                      | -2.04 |
| <i>M5005_Spy_0836</i> | <i>SpyM3_0773</i> | acid phosphatase/phosphotransferase                        | -2.05 |
| <i>M5005_Spy_0498</i> | <i>SpyM3_0423</i> | transcriptional regulator                                  | -2.08 |
| <i>M5005_Spy_0676</i> | <i>SpyM3_0589</i> | hypothetical protein                                       | -2.08 |
| <i>M5005_Spy_1790</i> | <i>SpyM3_1792</i> | hypothetical protein                                       | -2.10 |
| <i>tkt</i>            | <i>tkt</i>        | transketolase                                              | -2.11 |
| <i>M5005_Spy_0197</i> | <i>SpyM3_0164</i> | ABC transporter ATP-binding/membrane spanning protein      | -2.11 |
| <i>M5005_Spy_0681</i> | <i>SpyM3_0594</i> | two-component sensory transduction histidine kinase        | -2.13 |
| <i>M5005_Spy_1374</i> | <i>SpyM3_1461</i> | hypothetical protein                                       | -2.14 |
| <i>isp</i>            | <i>isp</i>        | hypothetical protein                                       | -2.16 |
| <i>M5005_Spy_0680</i> | <i>SpyM3_0593</i> | two-component response regulator                           | -2.16 |
| <i>pfID</i>           | <i>pfID</i>       | pyruvate formate-lyase                                     | -2.20 |
| <i>mur1.1</i>         | <i>mur1.1</i>     | peptidoglycan hydrolase                                    | -2.20 |
| <i>M5005_Spy_0852</i> | <i>SpyM3_0788</i> | oxidoreductase, short chain dehydrogenase/reductase        | -2.21 |
| <i>mipB</i>           | <i>mipB</i>       | fructose-6-phosphate aldolase                              | -2.22 |
| <i>lppC</i>           | <i>lppC</i>       | acid phosphatase                                           | -2.24 |
| <i>asnA</i>           | <i>asnA</i>       | asparagine synthetase AsnA                                 | -2.25 |
| <i>sagA</i>           | <i>sagA</i>       | streptolysin S associated protein                          | -2.25 |
| <i>nrdD</i>           | <i>nrdD</i>       | anaerobic ribonucleoside triphosphate reductase            | -2.26 |
| <i>uviB</i>           | <i>uviB</i>       | hypothetical protein                                       | -2.27 |
| <i>M5005_Spy_0549</i> | <i>SpyM3_0472</i> | hypothetical protein                                       | -2.28 |
| <i>M5005_Spy_0457</i> | <i>SpyM3_0394</i> | hypothetical protein                                       | -2.30 |
| <i>M5005_Spy_1306</i> | <i>SpyM3_1287</i> | two-component sensor histidine kinase                      | -2.33 |
| <i>sdhA</i>           | <i>sdhA</i>       | L-serine dehydratase alpha subunit                         | -2.33 |
| <i>M5005_Spy_0571</i> | <i>SpyM3_0489</i> | hypothetical protein                                       | -2.35 |
| <i>nrdG</i>           | <i>nrdG</i>       | anaerobic ribonucleotide reductase activator               | -2.38 |
| <i>M5005_Spy_1726</i> | <i>SpyM3_1734</i> | ABC transporter permease                                   | -2.43 |
| <i>M5005_Spy_1601</i> | <i>SpyM3_1626</i> | hypothetical protein                                       | -2.43 |
| <i>M5005_Spy_0593</i> | <i>SpyM3_0512</i> | hypothetical protein                                       | -2.44 |
| <i>clpL</i>           | <i>clpL</i>       | ATP-dependent Clp proteinase (ATP-binding subunit)         | -2.45 |
| <i>dnaJ</i>           | <i>dnaJ</i>       | molecular chaperone DnaJ                                   | -2.55 |
| <i>ahpF</i>           | <i>ahpF</i>       | NADH oxidase/alkyl hydroperoxidase                         | -2.55 |
| <i>hrcA</i>           | <i>hrcA</i>       | heat-inducible transcription repressor                     | -2.58 |
| <i>M5005_Spy_1377</i> | <i>SpyM3_1464</i> | trans-acting positive regulator                            | -2.67 |
| <i>nrdF</i>           | <i>nrdF</i>       | ribonucleotide-diphosphate reductase subunit beta          | -2.71 |
| <i>purD</i>           | <i>purD</i>       | phosphoribosylamine--glycine ligase                        | -2.75 |
| <i>scrA</i>           | <i>scrA</i>       | PTS system sucrose-specific transporter subunit IIABC      | -2.75 |
| <i>sdhB</i>           | <i>sdhB</i>       | L-serine dehydratase beta subunit                          | -2.77 |
| <i>M5005_Spy_1343</i> | <i>SpyM3_1377</i> | LysR family transcriptional regulator                      | -2.80 |
| <i>purF</i>           | <i>purF</i>       | amidophosphoribosyltransferase                             | -2.83 |
| <i>M5005_Spy_1144</i> | <i>SpyM3_1070</i> | hypothetical protein                                       | -2.88 |
| <i>M5005_Spy_0202</i> | <i>SpyM3_0169</i> | hypothetical protein                                       | -2.89 |
| <i>M5005_Spy_1373</i> | <i>SpyM3_1460</i> | ABC transporter ATP-binding protein                        | -2.90 |
| <i>grpE</i>           | <i>grpE</i>       | heat shock protein GrpE                                    | -2.99 |
| <i>M5005_Spy_0366</i> | <i>SpyM3_0316</i> | hypothetical protein                                       | -3.02 |
| <i>M5005_Spy_0750</i> | <i>SpyM3_0660</i> | ABC transporter ATP-binding protein                        | -3.04 |
| <i>ropB</i>           | <i>ropB</i>       | transcription regulator                                    | -3.14 |
| <i>nrdE.1</i>         | <i>nrdE.1</i>     | ribonucleotide-diphosphate reductase subunit alpha         | -3.17 |
| <i>M5005_Spy_1749</i> | <i>SpyM3_1755</i> | pyruvate formate-lyase activating enzyme                   | -3.17 |
| <i>sloR</i>           | <i>sloR</i>       | regulatory protein                                         | -3.25 |
| <i>purE</i>           | <i>purE</i>       | phosphoribosylaminoimidazole carboxylase catalytic subunit | -3.33 |
| <i>M5005_Spy_1786</i> | <i>SpyM3_1788</i> | hypothetical protein                                       | -3.33 |
| <i>nrdI</i>           | <i>nrdI</i>       | ribonucleotide reductase stimulatory protein               | -3.33 |
| <i>M5005_Spy_0572</i> | <i>SpyM3_0490</i> | hypothetical protein                                       | -3.35 |
| <i>int.2</i>          | <i>int.2</i>      | integrase - phage associated                               | -3.43 |
| <i>M5005_Spy_1729</i> | <i>SpyM3_1737</i> | hypothetical protein                                       | -3.44 |
| <i>M5005_Spy_1727</i> | <i>SpyM3_1735</i> | ABC transporter ATP-binding protein                        | -3.60 |
| <i>M5005_Spy_0123</i> | <i>SpyM3_0112</i> | hypothetical protein                                       | -3.63 |
| <i>M5005_Spy_1728</i> | <i>SpyM3_1736</i> | ATP-binding cassette transporter protein                   | -3.65 |
| <i>metB</i>           | <i>metB</i>       | cystathionine beta-lyase                                   | -4.00 |
| <i>nagB</i>           | <i>nagB</i>       | N-acetylglucosamine-6-phosphate isomerase                  | -4.40 |
| <i>smeZ</i>           | <i>smeZ</i>       | hypothetical protein                                       | -4.50 |
| <i>secE</i>           | <i>secE</i>       | preprotein translocase subunit SecE                        | -4.74 |

|                       |                   |                                                              |         |
|-----------------------|-------------------|--------------------------------------------------------------|---------|
| <i>xpt</i>            | <i>xpt</i>        | xanthine phosphoribosyltransferase                           | -4.80   |
| <i>M5005_Spy_0771</i> | <i>SpyM3_0679</i> | hypothetical protein                                         | -5.00   |
| <i>M5005_Spy_1153</i> | <i>SpyM3_1078</i> | cation/potassium uptake protein                              | -5.50   |
| <i>M5005_Spy_0770</i> | <i>SpyM3_0678</i> | hypothetical protein                                         | -5.67   |
| <i>M5005_Spy_0859</i> | <i>SpyM3_0795</i> | purine (xanthine) permease                                   | -6.65   |
| <i>M5005_Spy_1730</i> | <i>SpyM3_1738</i> | hypothetical protein                                         | -7.03   |
| <i>endoS</i>          | <i>endoS</i>      | secreted endoglycosidase                                     | -8.25   |
| <i>M5005_Spy_0475</i> | <i>SpyM3_0404</i> | PTS system beta-glucoside-specific transporter subunit IIABC | -9.00   |
| <i>scrK</i>           | <i>SpyM3_1567</i> | fructokinase                                                 | -10.00  |
| <i>M5005_Spy_0769</i> | <i>SpyM3_0677</i> | hypothetical protein                                         | -11.00  |
| <i>agaS</i>           | <i>SpyM3_0468</i> | tagatose-6-phosphate aldose/ketose isomerase                 | -11.00  |
| <i>M5005_Spy_0544</i> | <i>SpyM3_0467</i> | GntR family transcriptional regulator                        | -14.00  |
| <i>rofA</i>           | <i>nra</i>        | negative transcriptional regulator                           | -29.20  |
| <i>M5005_Spy_0111</i> | <i>SpyM3_0102</i> | hypothetical protein                                         | -230.00 |
| <i>M5005_Spy_0107</i> | <i>SpyM3_0098</i> | collagen binding protein                                     | -324.00 |
| <i>M5005_Spy_0109</i> | <i>SpyM3_0100</i> | hypothetical protein                                         | -417.00 |
| <i>M5005_Spy_0108</i> | <i>SpyM3_0099</i> | hypothetical protein                                         | -463.00 |

**Table S1**

Differentially regulated genes between MGAS2221 and MGAS10870, as identified by RNA-Seq.

| Strain                       | Description                                                                                                                     | Reference                                                                 |
|------------------------------|---------------------------------------------------------------------------------------------------------------------------------|---------------------------------------------------------------------------|
| MGAS2221                     | Clinical M1 GAS isolate recovered in 1988 from Australia                                                                        | Sumby <i>et al.</i> , 2006. <i>PLoS Pathog.</i> 2(1):e5.                  |
| MGAS313                      | Clinical M1 GAS isolate recovered in the 1980s from Wyoming, USA                                                                | Sumby <i>et al.</i> , 2006. <i>PLoS Pathog.</i> 2(1):e5.                  |
| MGAS1264                     | Clinical M1 GAS isolate recovered in 1973 from Denmark                                                                          | Sumby <i>et al.</i> , 2006. <i>PLoS Pathog.</i> 2(1):e5.                  |
| MGAS1508                     | Clinical M1 GAS isolate recovered in 1985 from the former Czechoslovakia                                                        | Sumby <i>et al.</i> , 2005. <i>J Infect Dis</i> 192: 771-82.              |
| MGAS22259                    | Clinical M1 GAS isolate recovered in 2010 from Alberta, Canada                                                                  | Cao <i>et al.</i> , 2014. <i>Infect Immun</i> 82:1744-54.                 |
| SF370                        | Clinical M1 GAS isolate recovered in 1985                                                                                       | Ferretti <i>et al.</i> , 2001. <i>Proc Natl Acad Sci USA.</i> 98:4658-63. |
| MGAS5005                     | Clinical M1 GAS isolate recovered in 1996 from Ontario, Canada                                                                  | Sumby <i>et al.</i> , 2005. <i>J Infect Dis</i> 192: 771-82.              |
| MGAS3350                     | Clinical M1 GAS isolate recovered in 1995 from Minnesota, USA                                                                   | Cao <i>et al.</i> , 2014. <i>Infect Immun</i> 82:1744-54.                 |
| MGAS5456                     | Clinical M1 GAS isolate recovered in 1994 from Finland                                                                          | Sumby <i>et al.</i> , 2006. <i>PLoS Pathog.</i> 2(1):e5.                  |
| MGAS9127                     | Clinical M1 GAS isolate recovered in the late 1990's from Alberta, Canada                                                       | Sumby <i>et al.</i> , 2005. <i>J Infect Dis</i> 192: 771-82.              |
| MGAS315                      | Clinical M3 GAS isolate recovered in the 1980s from Texas, USA                                                                  | Beres <i>et al.</i> , 2002. <i>Proc Natl Acad Sci USA</i> 99:10078-83.    |
| MGAS10870                    | Clinical M3 GAS isolate recovered in 2002 from Ontario, Canada                                                                  | Beres <i>et al.</i> , 2010. <i>Proc Natl Acad Sci USA.</i> 107:4371-6.    |
| MGAS491                      | Clinical M3 GAS isolate recovered pre-1991 from the UK                                                                          | Cao <i>et al.</i> , 2014. <i>Infect Immun</i> 82:1744-54.                 |
| MGAS159                      | Clinical M3 GAS isolate recovered in the late 1980s from Utah, USA                                                              | Cao <i>et al.</i> , 2014. <i>Infect Immun</i> 82:1744-54.                 |
| MGAS15049                    | Clinical M3 GAS isolate recovered in 2006 from Ontario, Canada                                                                  | Beres <i>et al.</i> , 2010. <i>Proc Natl Acad Sci USA.</i> 107:4371-6.    |
| MGAS182                      | Clinical M3 GAS isolate recovered in the 1940s from Ottawa, Canada                                                              | Beres <i>et al.</i> , 2010. <i>Proc Natl Acad Sci USA.</i> 107:4371-6.    |
| MGAS1254                     | Clinical M3 GAS isolate recovered in 1937 from New York, USA                                                                    | Beres <i>et al.</i> , 2010. <i>Proc Natl Acad Sci USA.</i> 107:4371-6.    |
| MGAS1428                     | Clinical M3 GAS isolate recovered in 1974 from Cottbus, Germany                                                                 | Beres <i>et al.</i> , 2010. <i>Proc Natl Acad Sci USA.</i> 107:4371-6.    |
| MGAS9056                     | Clinical M3 GAS isolate recovered in 1998 from Illinois, USA                                                                    | Beres <i>et al.</i> , 2010. <i>Proc Natl Acad Sci USA.</i> 107:4371-6.    |
| MGAS9507                     | Clinical M3 GAS isolate recovered in 2001 from Texas, USA                                                                       | Beres <i>et al.</i> , 2010. <i>Proc Natl Acad Sci USA.</i> 107:4371-6.    |
| MGAS22283                    | Clinical M3 GAS isolate recovered in 2010 from Alberta, Canada                                                                  | Beres <i>et al.</i> , 2010. <i>Proc Natl Acad Sci USA.</i> 107:4371-6.    |
| 31616/3065                   | Clinical M3 GAS isolate that originates from the Prague National Reference Centre for Streptococci                              | -                                                                         |
| 90-254                       | Clinical M3 GAS isolate recovered in 1990 from Georgia, USA. Is from a patient with TSL5                                        | -                                                                         |
| 90-132                       | Clinical M3 GAS isolate recovered in 1990 from Oregon, USA                                                                      | -                                                                         |
| L-035                        | Clinical M3 GAS isolate recovered from a case of pharyngitis in 1988 from Ohio, USA                                             | -                                                                         |
| PD-824                       | Clinical M3 GAS isolate recovered from a case of pharyngitis in 1990 from Virginia, USA                                         | -                                                                         |
| D944                         | Clinical M3 GAS isolate from Köln, Germany. Is emm3.92                                                                          | -                                                                         |
| D1216                        | Clinical M3 GAS isolate from Köln, Germany. Is emm3.23                                                                          | -                                                                         |
| D1253                        | Clinical M3 GAS isolate from Köln, Germany. Is emm3.92                                                                          | -                                                                         |
| 49/123                       | Clinical M49 GAS isolate from the Czech Republic                                                                                | Jaffe <i>et al.</i> , 1996. <i>Mol Microbiol.</i> 21:373-84.              |
| 591                          | Clinical M49 GAS isolate recovered from a skin infection in 2004 from Rostock, Germany                                          | Nakata <i>et al.</i> , 2005. <i>Mol Microbiol.</i> 57:786-803.            |
| 71-716                       | Clinical M49 GAS isolate                                                                                                        | Podbielski <i>et al.</i> , 1990. <i>Med Microbiol Immunol</i> 179:255-62. |
| 90-053                       | Clinical M49 GAS isolate recovered in 1990 from Minneapolis, USA                                                                | Jaffe <i>et al.</i> , 1996. <i>Mol Microbiol.</i> 21:373-84.              |
| 90-397                       | Clinical M49 GAS isolate recovered in 1990 from Minneapolis, USA                                                                | Jaffe <i>et al.</i> , 1996. <i>Mol Microbiol.</i> 21:373-84.              |
| 88-299                       | Clinical M49 GAS isolate recovered in 1988 from Minneapolis, USA                                                                | Jaffe <i>et al.</i> , 1996. <i>Mol Microbiol.</i> 21:373-84.              |
| 89-288                       | Clinical M49 GAS isolate recovered in 1989 from Minneapolis, USA                                                                | Jaffe <i>et al.</i> , 1996. <i>Mol Microbiol.</i> 21:373-84.              |
| 90-306                       | Clinical M49 GAS isolate recovered in 1990 from Minneapolis, USA                                                                | Jaffe <i>et al.</i> , 1996. <i>Mol Microbiol.</i> 21:373-84.              |
| M3 #1 + vector               | MGAS22283 containing the pDC123-derived vector pDCBB                                                                            | This work                                                                 |
| M3 #1 + pNra                 | MGAS22283 containing the pDC123-based plasmid pNra which expresses a functional Nra protein from M49 GAS                        | This work                                                                 |
| M3 #2 + vector               | MGAS9056 containing the pDC123-derived vector pDCBB                                                                             | This work                                                                 |
| M3 #2 + pNra                 | MGAS9056 containing the pDC123-based plasmid pNra which expresses a functional Nra protein from M49 GAS                         | This work                                                                 |
| M3 #3 + vector               | MGAS15049 containing the pDC123-derived vector pDCBB                                                                            | This work                                                                 |
| M3 #3 + pNra                 | MGAS15049 containing the pDC123-based plasmid pNra which expresses a functional Nra protein from M49 GAS                        | This work                                                                 |
| M3 #4 + vector               | MGAS10870 containing the pDC123-derived vector pDCBB                                                                            | This work                                                                 |
| M3 #4 + pNra                 | MGAS10870 containing the pDC123-based plasmid pNra which expresses a functional Nra protein from M49 GAS                        | This work                                                                 |
| M3 + vector                  | MGAS10870 containing the pDC123-derived vector pDCBB                                                                            | This work                                                                 |
| M3 + pNra                    | MGAS10870 containing the pDC123-based plasmid pNra which expresses a functional Nra protein from M49 GAS                        | This work                                                                 |
| M3 + pNra-M3                 | MGAS10870 containing the pDC123-based plasmid pNra-M3 which harbors the M3 GAS <i>nra</i> allele                                | This work                                                                 |
| M3 + pNra-M18                | MGAS10870 containing the pDC123-based plasmid pNra-M18 which harbors the M18 GAS <i>nra</i> allele                              | This work                                                                 |
| M3 + pMsmR                   | MGAS10870 containing the pDC123-based plasmid pMsmR which expresses a functional MsmR protein from M49 GAS                      | This work                                                                 |
| M3 + pNra <sup>FIX</sup>     | MGAS10870 containing the pDC123-based plasmid pNra <sup>FIX</sup> which expresses a modified M3 GAS Nra protein                 | This work                                                                 |
| M3Δnra                       | MGAS10870 derivative in which the <i>nra</i> gene was replaced with a spectinomycin resistance cassette                         | This work                                                                 |
| M3Δnra + vector              | M3Δnra containing the pDC123-derived vector pDCBB                                                                               | This work                                                                 |
| M3Δnra + pNra                | M3Δnra containing the pDC123-based plasmid pNra which expresses a functional Nra protein from M49 GAS                           | This work                                                                 |
| M3Δnra + pNra-M3             | M3Δnra containing the pDC123-based plasmid pNra-M3 which harbors the M3 GAS <i>nra</i> allele                                   | This work                                                                 |
| M3Δnra + pNra-M18            | M3Δnra containing the pDC123-based plasmid pNra-M18 which harbors the M18 GAS <i>nra</i> allele                                 | This work                                                                 |
| M3Δnra + pMsmR               | M3Δnra containing the pDC123-based plasmid pMsmR which expresses a functional MsmR protein from M49 GAS                         | This work                                                                 |
| M3Δnra + pNra <sup>FIX</sup> | M3Δnra containing the pDC123-based plasmid pNra <sup>FIX</sup> which expresses a modified M3 GAS Nra protein                    | This work                                                                 |
| MGAS8232                     | Clinical serotype M18 GAS isolate recovered in 1987 from Utah, USA                                                              | Smoot <i>et al.</i> , 2002. <i>Proc Natl Acad Sci USA.</i> 99:4668-73.    |
| M18 + vector                 | MGAS8232 containing the pDC123-derived vector pDCBB                                                                             | This work                                                                 |
| M18 + pNra                   | MGAS8232 containing the pDC123-based plasmid pNra which expresses a functional Nra protein from M49 GAS                         | This work                                                                 |
| M18 + pNra-M3                | MGAS8232 containing the pDC123-based plasmid pNra-M3 which harbors the M3 GAS <i>nra</i> allele                                 | This work                                                                 |
| M18 + pNra-M18               | MGAS8232 containing the pDC123-based plasmid pNra-M18 which harbors the M18 GAS <i>nra</i> allele                               | This work                                                                 |
| M3ΔmsmR                      | MGAS10870 derivative in which the <i>msmR</i> gene was replaced with a spectinomycin resistance cassette                        | This work                                                                 |
| M3ΔmsmR + vector             | M3ΔmsmR containing the pDC123-derived vector pDCBB                                                                              | This work                                                                 |
| M3ΔmsmR + pNra               | M3ΔmsmR containing the pDC123-based plasmid pNra which expresses a functional Nra protein from M49 GAS                          | This work                                                                 |
| M3ΔmsmR + pMsmR              | M3ΔmsmR containing the pDC123-based plasmid pMsmR which expresses a functional MsmR protein from M49 GAS                        | This work                                                                 |
| M3nra <sup>FIXED</sup>       | MGAS10870 derivative in which the M3-specific SNP within <i>nra</i> has been altered to that present in other serotypes (C800A) | This work                                                                 |
| M3nra <sup>FIXED</sup> ΔmsmR | M3nra <sup>FIXED</sup> derivative in which the <i>msmR</i> gene has been replaced with a spectinomycin resistance cassette      | This work                                                                 |
| M3.VNTR4                     | Derivative of MGAS10870 in which the VNTR within the <i>nra.cpa</i> intergenic regions has 7 A residues not the parental 8      | This work                                                                 |
| M3.VNTR6                     | As M3.VNTR4 but independently made                                                                                              | This work                                                                 |
| M3.VNTR7                     | As M3.VNTR4 and M3.VNTR6 but independently made                                                                                 | This work                                                                 |
| M3ΔcovR                      | Derivative of MGAS10870 in which a region of the <i>covR</i> gene has been replaced with a kanamycin resistance cassette        | This work                                                                 |
| M3ΔcovS                      | Derivative of MGAS10870 containing a 2 bp deletion within <i>covS</i>                                                           | This work                                                                 |
| M3rocA <sup>FIXED</sup>      | Derivative of MGAS10870 in which the mutation within <i>rocA</i> has been fixed (hence strain is <i>rocA+</i> )                 | Miller <i>et al.</i> , 2015. <i>Mol Microbiol.</i> 98:473-89.             |
| M1ΔcovR                      | Derivative of MGAS2221 in which a region of the <i>covR</i> gene has been replaced with a kanamycin resistance cassette         | Trevino <i>et al.</i> , 2009. <i>Infect Immun</i> 77:3141-9.              |
| M1ΔrocA                      | Derivative of MGAS2221 in which the <i>rocA</i> gene has been replaced with a spectinomycin resistance cassette                 | Miller <i>et al.</i> , 2015. <i>Mol Microbiol.</i> 98:473-89.             |
| M1ΔrofA                      | Derivative of MGAS2221 in which the <i>rofA</i> gene has been replaced with a spectinomycin resistance cassette                 | Liu <i>et al.</i> , 2012. <i>Mol Microbiol.</i> 86:140-54.                |

**Table S2**  
Overview of the GAS strains used in this study.



| Primer/probe name | Sequence                                                         | Use                                                                         |
|-------------------|------------------------------------------------------------------|-----------------------------------------------------------------------------|
| NRATMF            | TGTTTAAATGCGGTAGACG                                              | Tagman primer to assay <i>nra</i> mRNA in M3 and M49 GAS                    |
| NRATMR            | CCACCAATAATTCCTTTGCC                                             | Tagman primer to assay <i>nra</i> mRNA in M3 and M49 GAS                    |
| NRATMP            | TCCACAGCATATTGAAACTTGCTGCC                                       | Tagman probe to assay <i>nra</i> mRNA in M3 and M49 GAS                     |
| PROS.UTMF         | TACCACTGGCAATCGTACC                                              | Tagman primer to assay housekeeping gene <i>proS</i> in M1, M3, and M49 GAS |
| PROS.UTMR         | CATTTCAACAGCACCGATCT                                             | Tagman primer to assay housekeeping gene <i>proS</i> in M1, M3, and M49 GAS |
| PROS.UTMP         | CACGCATGATGGTCTGAATTTCTCA                                        | Tagman probe to assay housekeeping gene <i>proS</i> in M1, M3, and M49 GAS  |
| COVRTMF           | TGATGAAGCCGTGAGACTAATGT                                          | Tagman primer to assay <i>covR</i> mRNA in M1, M3, and M49 GAS              |
| COVRTMR           | CGCACTGTTGGATATAAGATTCTT                                         | Tagman primer to assay <i>covR</i> mRNA in M1, M3, and M49 GAS              |
| COVRTMP           | TCTCCGGGCAAAATGACATTCC                                           | Tagman probe to assay <i>covR</i> mRNA in M1, M3, and M49 GAS               |
| ROFATMF           | ACGCAGCAAGACAAAAACACTATT                                         | Tagman primer to assay <i>rofA</i> mRNA in M1 GAS                           |
| ROFATMR           | CCGCTTCCACGATAAAGCTAA                                            | Tagman primer to assay <i>rofA</i> mRNA in M1 GAS                           |
| ROFATMP           | TCCACCCACCTTAAACCTCTCCTGGTTA                                     | Tagman probe to assay <i>rofA</i> mRNA in M1 GAS                            |
| M3.FBABTMF        | GCCTGTTATCGAAAGCCTTCCCT                                          | Tagman primer to assay <i>fabB</i> mRNA in M3 GAS                           |
| M3.FBABTMR        | CCAGGCAGCTGTCTATATAGCTTAAA                                       | Tagman primer to assay <i>fabB</i> mRNA in M3 GAS                           |
| M3.FBABTMP        | CACTGCAAAAAAATCTGGGTAGATGCACC                                    | Tagman probe to assay <i>fabB</i> mRNA in M3 GAS                            |
| M3.CPATMF         | TTTAAAGTCTGAGTATGTTCCGGATA                                       | Tagman primer to assay <i>cpa</i> mRNA in M3 GAS                            |
| M3.CPATMR         | CCTTCCGCATTTCTGATAATGA                                           | Tagman primer to assay <i>cpa</i> mRNA in M3 GAS                            |
| M3.CPATMP         | TCCCCAAAAACCCAGGAGAAGAGCCTC                                      | Tagman probe to assay <i>cpa</i> mRNA in M3 GAS                             |
| M3.FCTATMF        | AATAAGCGTGACACTCAAGTTCCA                                         | Tagman primer to assay <i>tee</i> mRNA in M3 and M49 GAS                    |
| M3.FCTATMR        | AGCCACAATGCTAAGAACTGCAA                                          | Tagman primer to assay <i>tee</i> mRNA in M3 and M49 GAS                    |
| M3.FCTATMP        | CTGGTGTAGGGACCCCTTGCTCCA                                         | Tagman probe to assay <i>tee</i> mRNA in M3 and M49 GAS                     |
| M3.MSMRTMF        | AGGCGGTAATGGCTAGATG                                              | Tagman primer to assay <i>msmR</i> mRNA in M3 GAS                           |
| M3.MSMRTMR        | AGACGACTTGCCAAACAACA                                             | Tagman primer to assay <i>msmR</i> mRNA in M3 GAS                           |
| M3.MSMRTMP        | TGCTGATCCTGATATCATTATCCGCG                                       | Tagman probe to assay <i>msmR</i> mRNA in M3 GAS                            |
| 107TMF            | AAAAGGGAGTCAGAAAGTAACTGGT                                        | Tagman primer to assay <i>cpa</i> mRNA in M1 GAS                            |
| 107TMR            | CCGGAACCTGTTTGGCATT                                              | Tagman primer to assay <i>cpa</i> mRNA in M1 GAS                            |
| 107TMP            | CGTCAAGCTTTGAGCAACTGATTGATCC                                     | Tagman probe to assay <i>cpa</i> mRNA in M1 GAS                             |
| 109TMF            | ACTACTGTCAACGAGACGGAAATAAG                                       | Tagman primer to assay <i>tee1</i> mRNA in M1 GAS                           |
| 109TMR            | CGTATTGATCCACCTTTATCTGAATT                                       | Tagman primer to assay <i>tee1</i> mRNA in M1 GAS                           |
| 109TMP            | TGACTTTAGTCATCGGTGTGTTCAAAGCTACACC                               | Tagman probe to assay <i>tee1</i> mRNA in M1 GAS                            |
| M28CPATMF         | TTGGGACAGAATACCATCCA                                             | Tagman primer to assay <i>cpa</i> mRNA in M49 GAS                           |
| M28CPATMR         | TCCCAACTCACCAGTACTG                                              | Tagman primer to assay <i>cpa</i> mRNA in M49 GAS                           |
| M28CPATMP         | TGCATACGAATCAGCTCAACCAATCA                                       | Tagman probe to assay <i>cpa</i> mRNA in M49 GAS                            |
| UNR441            | AGATCTAAGCAGAACTTCTATACGTTCTGCACTGTCAAAATAGTATTTTACCATTTTCCAG    | Used with UNR442 to amplify <i>msmR</i> from M49 GAS                        |
| UNR442            | GGTTGTACAAATTTATCTGAAACAAAAAGCGCTCTATTTTATAATGAAACTTATTGAC       | Used with UNR441 to amplify <i>msmR</i> from M49 GAS                        |
| UNR443            | AGATCTAAGCAGAACTTCTATACGTTCTGCACTAAACTACACTGCTGCTTCTAATATTAG     | Used with UNR444 to clone the <i>nra</i> alleles from M3, M18, and M49 GAS  |
| UNR444            | GGTTGTACAAATTTATCTGAAACAAAAAGCGAGAAATGTAGAAGCACATACAACCTGAATC    | Used with UNR444 to clone the <i>nra</i> alleles from M3, M18, and M49 GAS  |
| UNR307            | GGTACTTGGTACCAAAAATTTG                                           | Used to create GAS strain M3Δnra                                            |
| UNR308            | CTATTTAAATAACAGATTAAAAAATATAATAAACGAGCAATFACAATAAATAACTGACTTTC   | Used to create GAS strain M3Δnra                                            |
| UNR309            | GGGATTTCCACATCACCAATC                                            | Used to create GAS strain M3Δnra                                            |
| UNR310            | GTACCAAATAGCATTTTGAATC                                           | Used to create GAS strain M3Δnra                                            |
| UNR311            | GTTATTAGTTATAGTTATTATAACATGTATTCTCTTTTGGACATAAGGCATGTAATAGCTCTC  | Used to create GAS strain M3Δnra                                            |
| UNR312            | CAGATCTTAAATAGATTACAG                                            | Used to create GAS strain M3Δnra                                            |
| UNR313            | GAAGTCAGTTATTTATTTGTAATGCTCGTTTATTATAAATTTTTTAACTGTTATTTAAATAG   | Used to create GAS strain M3Δnra                                            |
| UNR314            | GAGAGCTATTACATGCCTTATGTCAAAAAAGAGAATACATGTTATAATAACTATAACTAATAAC | Used to create GAS strain M3Δnra                                            |
| UNR315            | CCTAATGCTATTACCAATCAAG                                           | Used to create GAS strain M3ΔmsmR                                           |
| UNR316            | CTATTTAAATAACAGATTAAAAAATATAATAAACACCAGATAAATTTAAGAATTCAAG       | Used to create GAS strain M3ΔmsmR                                           |
| UNR317            | GCTATCATTGAAACAAAAGAGAG                                          | Used to create GAS strain M3ΔmsmR                                           |
| UNR318            | GTTATTAGTTATAGTTATTATAACATGTATTCAATCGAATCTAACCATTTGATAGATTGCC    | Used to create GAS strain M3ΔmsmR                                           |
| UNR319            | CGTTGCCGATCGTATAAATCTCT                                          | Used to create GAS strain M3ΔmsmR                                           |
| UNR320            | CTTCATATTTATCTATATCTG                                            | Used to create GAS strain M3ΔmsmR                                           |
| UNR321            | CTTGAATCTTAAATATTATCTCGGTTATTATAAATTTTTTAACTGTTATTTAAATAG        | Used to create GAS strain M3ΔmsmR                                           |
| UNR322            | GGCAATCTATAAATGGTTAGATTGCAATGTAATAACTATAACTAATAAC                | Used to create GAS strain M3ΔmsmR                                           |
| UNR323            | CTTCATATTTATCTATATCTG                                            | Used to create GAS strain M3ΔmsmR                                           |
| UNR222            | GGTAATATAAATTAAGAAAAGATAATCGAGATCTCCTGTGAGAACGTTAACG             | Used to create GAS strain M3nra <sup>FIXED</sup>                            |
| UNR223            | CGTTAACGTTCTCACAGGAGATCTCGAATTTCTTTTCTTAATTTATATTACC             | Used to create GAS strain M3nra <sup>FIXED</sup>                            |
| UNR224            | TGCCCTATGTCAAAAAGAAAAGGATAGTTTC                                  | Used to create GAS strain M3nra <sup>FIXED</sup>                            |
| UNR225            | GAACATATCCTTTTCTTTTGGACATAAGGCAGAACTAGAGCTTGATGAAAATTTGTTTG      | Used to create GAS strain M3nra <sup>FIXED</sup>                            |
| UNR226            | CAAACATTTTCCCTTTATGCTATAATCCGTACGCTAGCAATGTACA                   | Used to create GAS strain M3nra <sup>FIXED</sup>                            |
| UNR227            | GTAGACGATGACAGCGTGTGTG                                           | Used to create GAS strain M3nra <sup>FIXED</sup>                            |
| UNR96             | GATTATAGCATAAAGGAAAATGTTG                                        | Used to create GAS strain M3nra <sup>FIXED</sup>                            |
| COVUPUP           | GCTGATAAGAAAGAGTTGGTTGAAG                                        | Used with COVR1 to create GAS strain M3ΔcovR                                |
| COVR1             | TGAGCGCAGGTTTAAATTTAGG                                           | Used with COVUPUP to create GAS strain M3ΔcovR                              |
| BBLCS1            | CTGCCTTTACACTGATTGCCATAGTTCAAC                                   | Used with BBLCS4 to help create GAS strain M3ΔcovS                          |
| BBLCS2            | CAAAACAATTTTCTCAAGCTCTAGTTCTAATCTACTTTCAACCTTCATCTGTAATG         | Used with BBLCS3 to help create GAS strain M3ΔcovS                          |
| BBLCS3            | CGAAGAATGTCTGTTATCTGACAATATGTTAGACAAAATG                         | Used with BBLCS2 to help create GAS strain M3ΔcovS                          |
| BBLCS4            | CAATTTGTCTAACATATTGTCAGATAACAGACAATTTCTTG                        | Used with BBLCS1 to help create GAS strain M3ΔcovS                          |
| UNR619            | GGAAACAGCGAATGATTGACCAAAAAACGCTAAGCTACTTTAGTTAGAAGG              | Used with UNR623 to help create GAS strain M3.VNTR                          |
| UNR620            | CCTTCAAACAAAGTAGCTTAGCGTTTTTGGTCAATCAATCCGCTGTTCC                | Used with UNR625 to help create GAS strain M3.VNTR                          |
| UNR623            | CAAAACAATTTTCTCAAGCTCTAGTTCCCTAAAACGTAAGTCCCATTAGGTAGCTC         | Used with UNR619 to help create GAS strain M3.VNTR                          |
| UNR625            | TGTACAATGCTAGCGTACGATGACAAGGCAAGTAACATATTG                       | Used with UNR620 to help create GAS strain M3.VNTR                          |

Table S3  
Primers and probes used in this study.
